# Supplementary material for: Emotional signatures of climate policy support
Source: PLOS journal article supplement (doi:10.1371/journal.pclm.0000381), 2024-03-27
Supplement: S1 (10.1371/journal.pclm.0000381.s001) [file journal.pclm.0000381.s001]

## Sheet: Emotions
Overarching Emotion	Specific emotion questions: How strongly do you feel each of the following emotions when you think about the issue of global warming?	Jan 2010	Jun 2010	May 2011	Dec 2013	Oct 2015	Mar 2016	Nov 2016	Oct 2017	Mar 2018	Dec 2018	Nov 2019	Apr 2020	Dec 2020	Sep 2021	Apr 2022
Guilt	guilty	1001	1024	1010	830	0	0	0	0	0	0	1303	1029	1036	0	0
Guilt	ashamed	0	0	0	0	0	0	0	0	0	0	1303	0	0	0	0
Anger	angry	1001	1024	1010	830	0	1204	1226	1304	1278	1114	1303	1029	1036	1006	1008
Anger	disgusted	1001	1024	1010	830	0	1204	1226	1304	1278	1114	1303	1029	1036	1006	1007
Anger	outraged	0	0	0	0	0	1204	1226	1304	1278	1114	1303	1029	1036	1006	1007
Anger	betrayed	0	0	0	0	0	0	0	0	0	0	0	1029	0	0	0
Hope	hopeful	1001	1024	1010	830	1330	1204	1226	1304	1278	1114	1303	1029	1036	1006	1007
Hope	courageous	0	0	0	0	0	0	0	0	0	0	1303	0	0	0	0
Hope	brave	0	0	0	0	0	0	0	0	0	0	0	1029	0	0	0
Hope	resilient	0	0	0	0	0	0	0	0	0	0	0	1029	0	0	0
Sad	hopeless	0	0	0	0	0	0	0	0	0	0	0	1029	1036	0	0
Sad	sad	1001	1024	1010	830	0	0	0	0	0	0	0	0	0	0	1010
Sad	depressed	1001	1024	1010	830	0	0	0	0	0	0	0	1029	1036	0	0
Fear	afraid	1001	1024	1010	830	0	1204	1226	1304	1278	1114	1303	1029	1036	0	1006
Fear	anxious	0	0	0	0	0	0	0	0	0	0	0	1029	1036	0	0
Fear	panicked	0	0	0	0	0	0	0	0	0	0	0	1029	1036	0	0
Note: Entries in this table are the number of people who participated in that wave of the survey		Note: Entries indicate the number of responses for that particular item in the indicated wave.

## Sheet: Policy
Personally Costly	Regulatory	Proactive	Climate Justice	Item Wording	Coding notes	Jan 2010	Jun 2010	May 2011	Dec 2013	Oct 2015	Mar 2016	Nov 2016	Oct 2017	Mar 2018	Dec 2018	Nov 2019	Apr 2020	Dec 2020	Sep 2021	Apr 2022
1	1			Require companies that produce or import fossil fuels (coal, oil, and natural gas) to pay a tax (a 'carbon tax') even if it costs the average household an average of $180 per year.'		0	0	0	830	0	0	0	0	1278	1114	0	0	0	0	0
1	1			How much do you support or oppose the following policies: Require electric utilities to produce at least 20% of their electricity from wind, solar, or other renewable energy sources, even if it costs the average household an extra $100 a year.		1001	1024	1010	830	0	0	0	1304	1278	1114	1303	1029	0	0	0
1	1			How much would you support or oppose a cap and trade system if it significantly reduced global warming pollution, but raised your household energy costs by 15 dollars a month?		508	0	0	0	0	0	0	0	0	0	0	0	0	0	0
1	1			How much would you support or oppose a cap and trade system if it significantly reduced global warming pollution, but raised your household energy costs by 50 cents a day?		493	0	0	0	0	0	0	0	0	0	0	0	0	0	0
1	1			How much would you support or oppose a cap and trade system if every American household received a yearly {rebate/bonus} of $180 to offset their higher energy costs?		1001	0	0	0	0	0	0	0	0	0	0	0	0	0	0
1	1			Now, we’d like to ask you a few questions about a ‘cap and refund’ system to limit global warming pollution to limit global warming pollution: The government would set a national cap on the amount of global warming pollution that can be emitted and create a limited number of pollution permits within that cap. Energy companies would then be required to purchase these permits in a monthly auction, …		0	1024	0	0	0	0	0	0	0	0	0	0	0	0	0
1	1			The impact of this program on your pocketbook will depend on how much energy you use. People who use less energy than average will receive a larger clean energy bonus, while people who use more energy than average will spend more than they receive from the refund.		0	1024	0	0	0	0	0	0	0	0	0	0	0	0	0
1	*Exc.			Congress is considering a {carbon tax policy/cap-and-trade policy; message experiment with only one option shown, both conditions included in anlaysis} that would reduce U.S. greenhouse gas emissions 17% by 2020. This policy would increase the cost of living for all American households. In support of this policy, what is the maximum amount your household would be willing to pay each year for the …		0	1024	0	0	0	0	0	0	0	0	0	0	0	0	0
1	*Exc.			How much do you support or oppose: A $5-a-month increase in property taxes, to provide funding to help homeowners make energy-efficiency improvements to their homes (such as replacing old, inefficient furnaces, water heaters, air conditioners, and insulation).		0	0	1010	0	0	0	0	0	0	0	0	0	0	0	0
1	*Exc.			In support of this policy, what is the maximum amount your household would be willing to pay each year for the next 10 years?		0	0	1010	0	0	0	0	0	0	0	0	0	0	0	0
1		1		How much do you support or oppose: A $1.50 fee added to your monthly electric utility bill to fund local programs to save energy.		0	0	1010	0	0	0	0	0	0	0	0	0	0	0	0
1		1		How much do you support or oppose: Paying 5% more on your monthly utility bill to get your electricity from renewable energy sources, like wind or solar.		0	0	1010	0	0	0	0	0	0	0	0	0	0	0	0
1		1		How much do you support or oppose: A $5-a-month increase in property taxes, to provide funding to homeowners that install solar panels.		0	0	1010	0	0	0	0	0	0	0	0	0	0	0	0
1		*Exc.		How much do you support or oppose the following: Establish a special fund to help make buildings more energy efficient and teach Americans how to reduce their energy use. This would add a $2.50 surcharge to the average household's monthly electric bill.		1001	1024	0	0	0	0	0	0	0	0	0	0	0	0	0
1		*Exc.		How much do you support or oppose: A 10-cent fee added to each gallon of gasoline you buy, to fund local programs to improve public transportation.		0	0	1010	0	0	0	0	0	0	0	0	0	0	0	0
1		*Exc.		How much more would you be willing to pay each month on your electricity bill to purchase 100% of your electricity from renewable sources (solar and wind)?		0	0	0	0	0	0	1226	0	0	0	0	0	0	0	0
*Exc.	1			['Regulations requiring any new home to be more energy efficient. This would increase the initial cost by about $7,500, but save about $17,000 in utility bills over 30 years.'] How much do you support or oppose...?		0	0	1010	0	0	0	0	0	0	0	0	0	0	0	0
*Exc.	*Exc.			If a tax on fossil fuels (coal, oil, and natural gas) to help reduce global warming were to cost your household {DOV_X788a} more each year in higher energy bills, would you support or oppose it?	Reverse Coded	0	0	1010	0	0	0	0	0	0	0	0	0	0	0	0
*Exc.		*Exc.		If this policy were to cost your household (bid amount) more each year in higher electricity bills, would you support or oppose this policy?	if (DOV_x788 = 1) x788ren = 3-x788.	0	0	0	0	0	0	1226	0	0	0	0	0	0	0	0
*Exc.				[Increase taxes on gasoline by 25 cents per gallon and return the revenues to taxpayers by reducing the federal income tax.] How much do you support or oppose the following policies?		1001	1024	1010	0	0	0	0	0	0	0	0	0	0	0	0
	1	1		Do you think federal subsidies for the renewable energy industry (such as solar, wind, and geothermal) should be increased, decreased, or remain about the same as they currently are?		0	0	0	0	0	0	0	0	0	0	0	0	1036	0	0
	1	1		[Transition the U.S. economy (including electric utilities, transportation, buildings, and industry) from fossil fuels to 100% clean energy by 2050] How much do you support or oppose the following policies?		0	0	0	0	0	0	0	0	0	0	0	0	1036	1006	1012
	1	*Exc.		If your household received an annual energy {#DOVQ189_194} of $180 from a cap and trade system, how likely is it that you would spend this money on energy efficiency improvements in your home?		1001	0	0	0	0	0	0	0	0	0	0	0	0	0	0
	1	*Exc.		['Changing your county?s zoning rules to promote the construction of more energy-efficient apartment buildings, instead of less efficient single-family homes.'] How much do you support or oppose...?		0	0	1010	0	0	0	0	0	0	0	0	0	0	0	0
	1	*Exc.		['Changing your county?s zoning rules to require that neighborhoods have a mix of housing, offices, industry, schools, and stores close together, to encourage walking and decrease the need for a car.'] How much do you support or oppose...?		0	0	1010	0	0	0	0	0	0	0	0	0	0	0	0
	1	*Exc.		['Changing your county?s zoning rules to decrease suburban sprawl and concentrate new development near the center of cities and towns, reducing commuting times.'] How much do you support or oppose...?		0	0	1010	0	0	0	0	0	0	0	0	0	0	0	0
	1			[Require fossil fuel companies to pay a carbon tax and use the money to reduce other taxes (such as income tax) by an equal amount.] How much do you support or oppose the following policies?		0	0	0	0	1330	1204	1226	1304	1278	1114	1303	1029	1036	1006	1010
	1			President Obama directing the EPA to set strict carbon dioxide emission limits on existing coal-fired power plants to reduce global warming and improve public health. Power plants would have to reduce their emissions or invest in renewable energy and energ		0	0	0	409	0	0	0	0	0	0	0	0	0	0	0
	1			Set strict carbon dioxide emission limits on existing coal-fired power plants to reduce global warming and improve public health. Power plants would have to reduce their emissions and/or invest in renewable energy and energy efficiency. The cost of electri		0	0	0	421	1330	1204	1226	1304	1278	1114	0	0	0	0	0
	1			How much do you support or oppose Congress and the President passing laws to increase energy efficiency and the use of renewable energy, as a way to reduce America?s dependence on fossil fuels?		0	0	0	830	0	0	0	0	0	0	0	0	0	0	0
	1			[Regulate carbon dioxide (the primary greenhouse gas) as a pollutant.] How much do you support or oppose the following policies?		1001	1024	0	830	1330	1204	1226	1304	1278	1114	1303	1029	1036	1006	1009
	1			How much do you support or oppose requiring electric utilities in your state to produce 100% of their electricity from clean, renewable energy sources (such as wind and solar) by 2050?		0	0	0	0	0	0	0	0	0	1114	0	0	0	0	0
	1			[Require electric utilities to produce 100% of their electricity from wind, solar, or other renewable energy sources by the year 2035] How much do you support or oppose the following policies?		0	0	0	0	0	0	0	0	0	0	0	0	1036	1006	1014
	1			[Sign an international treaty that requires the United States to cut its emissions of carbon dioxide 90% by the year 2050.] How much do you support or oppose the following policies?		1001	1024	1010	0	0	0	0	0	0	0	0	0	0	0	0
	1			How much would you support or oppose (cap and trade)?		1001	0	0	0	0	0	0	0	0	0	0	0	0	0	0
	1			How much would you support or oppose a cap and trade system if every American household received a yearly bonus of $180 to offset their higher energy costs?		486	0	0	0	0	0	0	0	0	0	0	0	0	0	0
	1			How much would you support or oppose a cap and trade system if every American household received a yearly rebate of $180 to offset their higher energy costs?		476	0	0	0	0	0	0	0	0	0	0	0	0	0	0
	1			In general, which of these two approaches to reducing the pollution that causes global warming do you prefer, if either?	dichotomized (1-3 as regulate; 4 as 0)	0	0	0	0	0	0	1226	0	0	0	0	0	0	0	0
	1			[Eliminate all carbon pollution created by coal, oil, and natural gas from the U.S. economy by 2050] How much do you support or oppose the following policies?		0	0	0	0	0	0	0	0	0	0	0	0	1036	0	0
	1			[Require that, by 2030, all new cars, trucks, and SUVs sold in the U.S. are electric vehicles] How much do you support or oppose the following policies?		0	0	0	0	0	0	0	0	0	0	0	0	1036	0	0
	1			[Set stronger fuel efficiency standards for cars, trucks, and SUVs] How much do you support or oppose the following policies?		0	0	0	0	0	0	0	0	0	0	0	0	1036	0	0
	1			[Set stronger energy efficiency standards for appliances] How much do you support or oppose the following policies?		0	0	0	0	0	0	0	0	0	0	0	0	1036	0	0
	1			[Set stronger energy efficiency standards for new buildings] How much do you support or oppose the following policies?		0	0	0	0	0	0	0	0	0	0	0	0	1036	0	0
	1			[Require publicly-traded corporations to disclose how much carbon pollution they produce] How much do you support or oppose the following policies?		0	0	0	0	0	0	0	0	0	0	0	0	1036	1006	0
	*Exc.			Eliminate all federal subsidies for the fossil fuel industry (oil, and natural gas), which currently total an estimated $10.4 billion a year'		0	0	0	830	0	0	0	0	0	0	0	0	0	0	0
	*Exc.			[Eliminate all federal subsidies for the fossil fuel industry (coal, oil, and natural gas), which currently total an estimated $20 billion a year] How much do you support or oppose the following policies?		0	0	0	0	0	0	1226	0	0	0	0	0	0	0	0
	*Exc.			Do you think federal subsidies for the fossil fuel industry (coal, oil, and natural gas) should be increased, decreased, or remain about the same as they currently are?	Reverse Coded	0	0	0	0	0	0	0	0	0	0	0	0	1036	0	0
	*Exc.			[Expand offshore drilling for oil and natural gas off the U.S. coast.] How much do you support or oppose the following policies?	Reverse Coded	1001	1024	1010	0	1330	1204	0	1304	1278	1114	1303	1029	1036	0	1011
	*Exc.			[Drill for oil in the Arctic National Wildlife Refuge.] How much do you support or oppose the following policies?	Reverse Coded	0	0	0	0	0	0	0	1304	1278	1114	1303	1029	1036	0	0
	*Exc.			[Drill for and mine fossil fuels (coal, oil, and natural gas) on public land in the U.S.] How much do you support or oppose the following policies?	Reverse Coded	0	0	0	0	0	0	1226	1304	1278	0	1303	1029	1036	0	1011
		1	1	[Provide federal funding to make residential buildings in low-income communities more energy efficient] How much do you support or oppose the following policies?		0	0	0	0	0	0	0	0	0	0	0	0	1036	0	1011
		1		[Fund more research into renewable energy sources, such as solar and wind power.'] How much do you support or oppose the following policies?		1001	1024	1010	830	1330	1204	1226	1304	1278	1114	1303	1029	1036	1006	1012
		1		[Provide tax rebates for people who purchase energy-efficient vehicles or solar panels.] How much do you support or oppose the following policies?		1001	1024	1010	830	1330	1204	1226	1304	1278	1114	1303	1029	1036	1006	1015
		1		[Generate renewable energy (solar and wind) on public land in the U.S.] How much do you support or oppose the following policies?		0	0	0	0	0	0	1226	1304	1278	0	1303	1029	1036	0	1011
		1		[Set aside 30% of America's lands and waters for conservation by 2030] How much do you support or oppose the following policies?		0	0	0	0	0	0	0	0	0	0	0	0	1036	1006	0
		1		[Install 500,000 electric vehicle charging stations across the U.S. by 2030] How much do you support or oppose the following policies?		0	0	0	0	0	0	0	0	0	0	0	0	1036	0	0
		1		[Provide tax incentives or rebates to homeowners, landlords, and businesses to purchase appliances that can be powered without burning fossil fuels (such as electric water heaters, electric heat pumps, and electric induction cooktops)] How much do you supp		0	0	0	0	0	0	0	0	0	0	0	0	1036	1006	1013
		1		[Provide tax incentives or rebates to homeowners, landlords, and businesses to make existing buildings more energy efficient] How much do you support or oppose the following policies?		0	0	0	0	0	0	0	0	0	0	0	0	1036	1006	1014
		1		[Provide federal funding to put solar panels on the roofs of public schools] How much do you support or oppose the following policies?		0	0	0	0	0	0	0	0	0	0	0	0	1036	0	0
		1		[Re-establish the Civilian Conservation Corps, which would employ workers to protect natural ecosystems, plant trees in rural and urban areas, and restore the soil on farmlands] How much do you support or oppose the following policies?		0	0	0	0	0	0	0	0	0	0	0	0	1036	0	1012
		1		[Provide federal funding to help farmers improve farming practices to protect and restore the soil so it absorbs and stores more carbon] How much do you support or oppose the following policies?		0	0	0	0	0	0	0	0	0	0	0	0	1036	0	1013
		1		[Providing funding to help homeowners make energy-efficiency improvements to their homes (such as replacing old, inefficient furnaces, water heaters, air conditioners, and insulation).] How much do you support or oppose the following policies for your loca		0	0	0	0	0	0	0	0	0	0	0	0	0	1006	1016
		*Exc.		Eliminate all federal subsidies for the renewable energy industry (solar, wind, and geothermal), which currently total an estimated $1.7 billion a year'	Reverse Coded	0	0	0	830	0	0	0	0	0	0	0	0	0	0	0
		*Exc.		If the government offered to double your annual {#DOVQ189_194} to $360 if you spent it all on energy efficiency improvements, how likely would you be to accept that offer?		1001	0	0	0	0	0	0	0	0	0	0	0	0	0	0
		*Exc.		[Build a national high-speed rail system] If Congress were to invest in the nations infrastructure, how would you like to see the money used?	created a combined proactive infrastructure spending item (all reverse coded)	0	0	0	0	0	0	1226	0	0	0	0	0	1036	0	0
		*Exc.		[Build a national high-speed rail system] What percentage of the total infrastructure investment would you like to see used for each option?	created a combined proactive infrastructure percentage spending item	0	0	0	0	0	0	595	0	0	0	0	0	0	0	0
		*Exc.		[Build a national system of electric vehicle charging stations] If Congress were to invest in the nations infrastructure, how would you like to see the money used?	created a combined proactive infrastructure spending item (all reverse coded)	0	0	0	0	0	0	1226	0	0	0	0	0	1036	0	0
		*Exc.		[Build a national system of electric vehicle charging stations] What percentage of the total infrastructure investment would you like to see used for each option?	created a combined proactive infrastructure percentage spending item	0	0	0	0	0	0	524	0	0	0	0	0	0	0	0
		*Exc.		[Install solar panels and wind turbines across the country] If Congress were to invest in the nations infrastructure, how would you like to see the money used?	created a combined proactive infrastructure spending item (all reverse coded)	0	0	0	0	0	0	1226	0	0	0	0	0	1036	0	0
		*Exc.		[Install solar panels and wind turbines across the country] What percentage of the total infrastructure investment would you like to see used for each option?	created a combined proactive infrastructure percentage spending item	0	0	0	0	0	0	841	0	0	0	0	0	0	0	0
		*Exc.		[Fund programs to help American communities prepare for and adapt to global warming] If implemented, how would you like to see the tax money used?	Reverse Coded	0	0	0	0	0	0	1226	0	0	0	0	0	0	0	0
		*Exc.		[Constructing bike paths and installing bike lanes on city streets.] How much do you support or oppose...?		0	0	1010	0	0	0	0	0	0	0	0	0	0	1006	1016
		*Exc.		[Increasing the availability of public transportation in your county.] How much do you support or oppose...?		0	0	1010	0	0	0	0	0	0	0	0	0	0	1006	1013
			1	[Assist workers in the coal industry that may lose their jobs as a result of the tax] If implemented, how would you like to see the tax money used?	Reverse Coded	0	0	0	0	0	0	1226	0	0	0	0	0	0	0	0
			1	[Assist workers in the coal industry that may lose their jobs as a result of the tax] What percentage of the total fossil fuel tax revenues would you like to see used for each option?	Calculated a combined CJ percentage spend variable	0	0	0	0	0	0	881	0	0	0	0	0	0	0	0
			1	[Assist low-income communities that are most vulnerable to the impacts of global warming] What percentage of the total fossil fuel tax revenues would you like to see used for each option?	Calculated a combined CJ percentage spend variable	0	0	0	0	0	0	703	0	0	0	0	0	0	0	0
			1	As a result of global warming, some communities in the United States are becoming uninhabitable due to increasing sea level rise, flooding, or wildfires. What do you think the U.S. federal government should do in response?	1-3 --> code as CJ; 4 = 0	0	0	0	0	0	0	0	0	0	0	0	1029	0	0	0
			1	[Create a jobs program that would hire unemployed oil and gas workers to safely close down thousands of abandoned oil and gas wells, which are a source of water and methane pollution] How much do you support or oppose the following policies?		0	0	0	0	0	0	0	0	0	0	0	0	1036	0	1012
			1	[Create a jobs program that would hire unemployed coal workers to safely close down old coal mines and restore the natural landscape] How much do you support or oppose the following policies?		0	0	0	0	0	0	0	0	0	0	0	0	1036	0	1013
			1	[Increase federal funding to low-income communities and communities of color who are disproportionally harmed by air and water pollution.] How much do you support or oppose the following policies?		0	0	0	0	0	0	0	0	0	0	0	0	1036	1006	1012
			1	Provide financial aid and technical support to developing countries that agree to limit their greenhouse gas emissions.		1001	0	0	0	0	0	0	0	0	0	0	0	0	1006	0
			1	Provide financial aid and technical support to developing countries to help them prepare for the impacts of global warming.		1001	0	0	0	0	0	0	0	0	0	0	0	0	1006	0
			*Exc.	[Assist low-income communities that are most vulnerable to the impacts of global warming] If implemented, how would you like to see the tax money used?	Reverse Coded	0	0	0	0	0	0	1226	0	0	0	0	0	0	0	0
Note: *Exc indicates that the item was excluded due to insufficient intercorrelation
Note: Entries on the left side of item wording indicate the type(s) pf policy support that the item was utilized for; entries to the right of item wording are the number of people who participated in that wave of the survey

## Sheet: Items by Wave
	Jan 2010	Jun 2010	May 2011	Dec 2013	Oct 2015	Mar 2016	Nov 2016	Oct 2017	Mar 2018	Dec 2018	Nov 2019	Apr 2020	Dec 2020	Sep 2021	Apr 2022
Personal Cost	x	x	x	x			x	x	x	x	x	x
Regulatory	x	x	x	x	x	x	x	x	x	x	x	x	x	x	x
Proactive	x	x	x	x	x	x	x	x	x	x	x	x	x	x	x
Climate Justice	x						x					x	x	x	x
Guilt	x	x	x	x							x	x	x
Anger	x	x	x	x		x	x	x	x	x	x	x	x	x	x
Hope	x	x	x	x	x	x	x	x	x	x	x	x	x	x	x
Sadness	x	x	x	x	x	x	x	x	x	x	x	x	x		x
Fear	x	x	x	x		x	x	x	x	x	x	x	x	x	x
